# Supplementary material for: Synaptic Characteristics from Homogeneous Resistive Switching in Pt/Al2O3/TiN Stack
Source: PubMed Central journal article supplement (PMC7603159; doi:10.3390/nano10102055), 2020-10-18
Supplement: nanomaterials-10-02055-s001.pdf [file nanomaterials-10-02055-s001.pdf]

Supplementary Materials

# Synaptic Characteristics from Homogeneous Resistive Switching in Pt/Al<sub>2</sub>O<sub>3</sub>/TiN Stack

Hojeong Ryu and Sungjun Kim\*

Division of Electronics and Electrical Engineering, Dongguk University, Seoul 04620, South Korea; hojeong.ryu95@gmail.com

\*Correspondence: sungjun@dongguk.edu

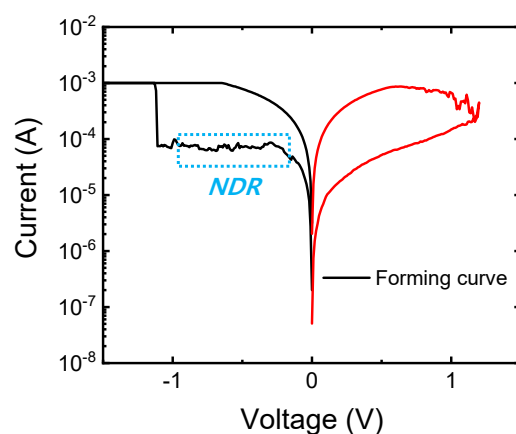

**Figure S1.** Negative differential resistance behavior in forming curve of Pt/Al<sub>2</sub>O<sub>3</sub>/TiN device.

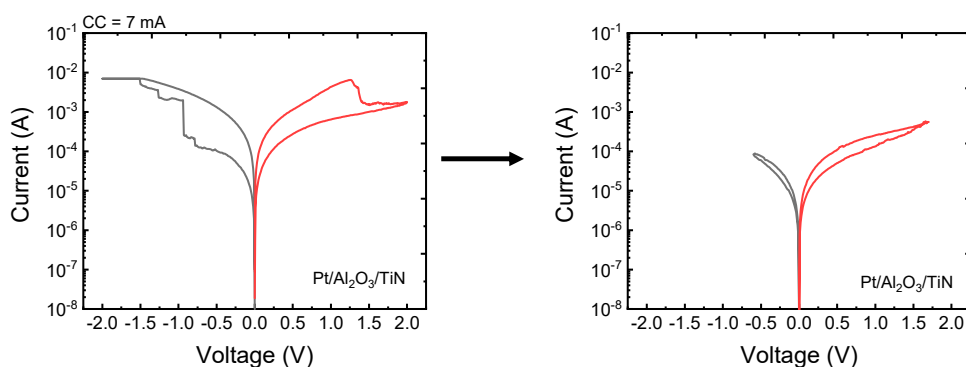

**Figure S2.** Transition from filamentary switching to homogeneous switching in Pt/Al<sub>2</sub>O<sub>3</sub>/TiN device.

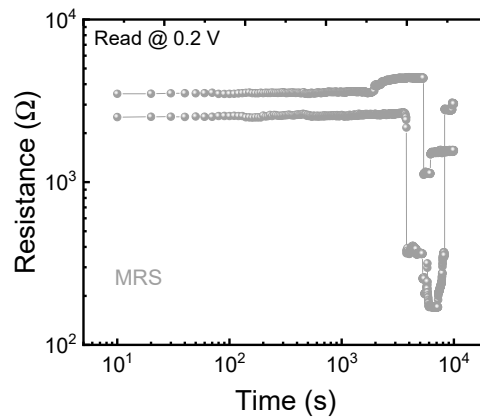

**Figure S3.** Drift characteristics of filamentary switching with self-compliance (type 2) in middle resistance states of Pt/Al<sub>2</sub>O<sub>3</sub>/TiN device.

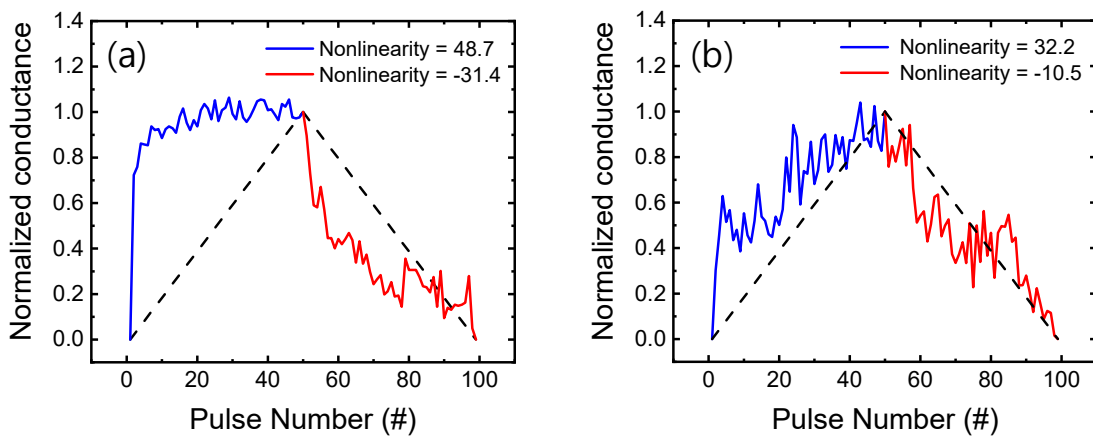

**Figure S4.** Nonlinearity of the potentiation and depression curves for (a) type 2 and (b) type 3. Nonlinearity is calculated by following equation.

$$NL = \text{average} \left( \left| \frac{G - G_{\text{Linear}}}{G} \right| \times 100 \right)$$

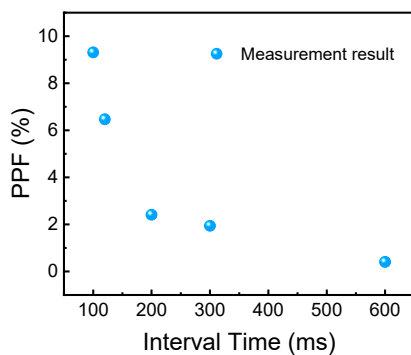

$$PPF (\%) = C_1 \cdot \exp(-t/\tau_1) + C_2 \cdot \exp(-t/\tau_2)$$

$$C_1 = 25.5$$

$$C_2 = 5$$

$$\tau_1 = 70$$

$$\tau_2 = 230$$

**Figure S5.** PPF index as a function of interval time.
